# Supplementary material for: Soil Heavy Metal Distribution with Depth around a Closed Landfill and Their Uptake by Datura stramonium
Source: Hindawi journal article supplement (doi:10.1155/2020/8872475), 2020-09-15
Supplement: f1 [file 8872475.f1.docx]

Supplemental Table 1: CF and PLI at different depths for the different sites around the closed Lumberstewart landfill

| Soil depth | Location | Contamination Factor (CF) | | | | | | | | | | | | | | PLI |
| --- | --- | --- | --- | --- | --- | --- | --- | --- | --- | --- | --- | --- | --- | --- | --- | --- |
| Cu | | Fe | | Zn | | Cd | | Cr | | | Ni | | |
|  | Site 1 | 3.25 | | 2.29 | | 0.91 | | 40.00 | | 3.00 | | | 1.30 | | | 3.19 |
|  | Site 2 | 2.78 | | 2.21 | | 0.98 | | 1.00 | | 3.16 | | | 1.70 | | | 1.78 |
|  | Site 3 | 2.73 | | 2.75 | | 0.94 | | 1.00 | | 2.97 | | | 1.60 | | | 1.80 |
| 0 – 30cm | Site 4 | 2.83 | | 2.16 | | 0.98 | | 20.00 | | 3.02 | | | 1.70 | | | 2.92 |
|  | Site 5 | 3.21 | | 2.09 | | 0.91 | | 1.00 | | 3.00 | | | 1.40 | | | 1.71 |
|  | Site 6 | 3.28 | | 2.36 | | 0.92 | | 50.00 | | 3.30 | | | 1.40 | | | 3.44 |
|  | Site 7 | 3.25 | | 2.27 | | 0.92 | | 44.00 | | 3.03 | | | 1.30 | | | 3.25 |
|  | Site 8 | 2.85 | | 1.94 | | 0.91 | | 1.00 | | 2.92 | | | 1.40 | | | 1.72 |
|  | Site 9 | 2.74 | | 2.06 | | 0.95 | | 1.00 | | 2.98 | | | 1.60 | | | 1.72 |
|  | Site 10 | 2.54 | | 1.89 | | 0.91 | | 1.00 | | 2.70 | | | 1.50 | | | 1.61 |
|  | Site 11 | 1.93 | | 1.99 | | 0.90 | | 1.00 | | 2.66 | | | 1.50 | | | 1.55 |
|  | Site 12 | 2.69 | | 1.88 | | 0.91 | | 1.00 | | 2.66 | | | 1.30 | | | 1.59 |
|  |  | Cu | Fe | | Zn | | | Cd | | | Cr | | Ni | |  | |
|  | Site 1 | 4.62 | 5.86 | | 145.00 | | | 1.00 | | | 3.63 | | 1.68 | | 5.37 | |
|  | Site 2 | 5.41 | 5.68 | | 252.00 | | | 120.00 | | | 1.18 | | 2.43 | | 11.77 | |
|  | Site 3 | 5.39 | 5.52 | | 215.00 | | | 110.00 | | | 1.13 | | 2.43 | | 11.16 | |
|  | Site 4 | 5.64 | 4.83 | | 233.00 | | | 1.00 | | | 1.18 | | 2.23 | | 5.06 | |
|  | Site 5 | 6.33 | 2.50 | | 423.00 | | | 1.00 | | | 4.00 | | 1.57 | | 5.90 | |
| 30 – 60 cm | Site 6 | 4.90 | 5.94 | | 179.00 | | | 20.00 | | | 3.69 | | 1.69 | | 9.31 | |
|  | Site 7 | 4.82 | 5.86 | | 165.00 | | | 10.00 | | | 3.63 | | 1.69 | | 8.12 | |
|  | Site 8 | 5.92 | 4.20 | | 400.00 | | | 1.00 | | | 3.91 | | 1.03 | | 5.85 | |
|  | Site 9 | 5.40 | 5.56 | | 223.00 | | | 1.00 | | | 3.32 | | 2.18 | | 6.04 | |
|  | Site 10 | 3.82 | 4.74 | | 209.00 | | | 1.00 | | | 3.38 | | 2.12 | | 5.48 | |
|  | Site 11 | 3.77 | 4.66 | | 205.00 | | | 1.00 | | | 3.37 | | 2.10 | | 5.42 | |
|  | Site 12 | 4.10 | 4.16 | | 159.00 | | | 1.00 | | | 3.25 | | 1.03 | | 4.57 | |
|  |  | Cu | Fe | | Zn | | Cd | | Cr | | | Ni | |  | | |
|  | Site 1 | 9.60 | 3.09 | | 1.32 | | 80.00 | | 1.08 | | | 1.30 | | 4.05 | | |
|  | Site 2 | 3.00 | 2.46 | | 1.72 | | 1.00 | | 2.17 | | | 1.23 | | 1.80 | | |
|  | Site 3 | 2.71 | 2.29 | | 1.60 | | 1.00 | | 2.00 | | | 1.23 | | 1.70 | | |
|  | Site 4 | 2.87 | 2.90 | | 1.66 | | 60.00 | | 1.84 | | | 0.96 | | 3.37 | | |
|  | Site 5 | 3.39 | 3.59 | | 1.20 | | 1.00 | | 3.49 | | | 0.95 | | 1.91 | | |
|  | Site 6 | 9.62 | 3.18 | | 1.37 | | 40.00 | | 3.78 | | | 1.35 | | 4.52 | | |
| 60 – 90 cm | Site 7 | 9.61 | 3.11 | | 1.35 | | 100.00 | | 4.03 | | | 1.33 | | 5.28 | | |
|  | Site 8 | 3.20 | 2.30 | | 1.15 | | 1.00 | | 3.41 | | | 0.96 | | 1.74 | | |
|  | Site 9 | 2.82 | 2.37 | | 1.62 | | 1.00 | | 3.29 | | | 0.93 | | 1.79 | | |
|  | Site 10 | 2.32 | 2.11 | | 1.56 | | 1.00 | | 3.08 | | | 0.90 | | 1.66 | | |
|  | Site 11 | 2.28 | 2.10 | | 1.53 | | 1.00 | | 3.07 | | | 0.89 | | 1.65 | | |
|  | Site 12 | 2.75 | 2.29 | | 1.14 | | 1.00 | | 3.08 | | | 0.86 | | 1.63 | | |
